# Supplementary material for: GhENODL6 Isoforms from the Phytocyanin Gene Family Regulated Verticillium Wilt Resistance in Cotton
Source: MDPI journal article supplement (doi:10.3390/ijms23062913), 2022-03-08
Supplement: s1 [file s1]

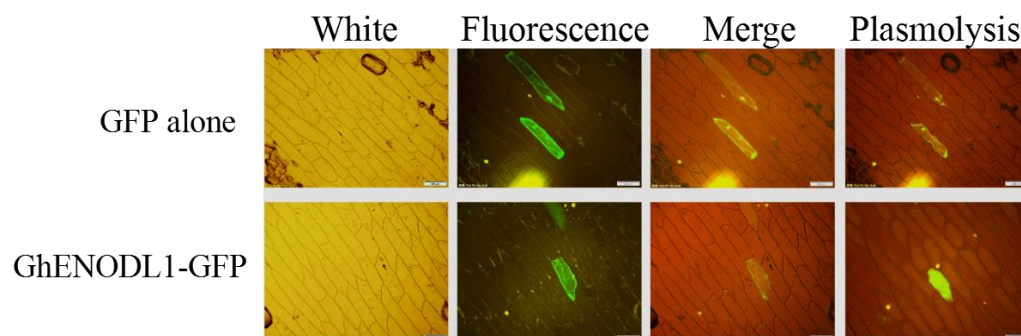

### Supplemental files 1:Figure S1

Subcellular localization of GFP alone or GhENODL1-GFP fusion on onion epidermis transiently transformed by Particle bombardment. The green fluorescence were monitored using a confocal laser scanning microscope. Bars = 200  $\mu$ m.



ATIG45063.1 VGDS DG. WTAKD. . . . . HLYYHWTEDEKE. I HVGDSL I FEYDH. . . . . NLNDVTQVS GGLEYEF DSS FPKAVYNT. . . . . GHDVTFTEPCSYFYI TS NH. . . . . TQTS GQRIGVFVV  
 AT3G53330.1 VGGS RG. WS. . . . . GKTNS WAERKE. FHVGDSL I FQYHQ. . . . . NVNDVTQLS DALKYES NSS S PKAVYNT. . . . . GHDVTF LSS MKS HVRS LHHH. . . . . EARPVNGHDLAI T  
 AT4G01380.1 PSL S. . . . . TI ETWFSI KLV. FHVGDSL I FEHNH. . . . . NLNDVTQVS GALEYEF DSS S PKAVYNT. . . . . GHDI S. . . . . VCGS. . . . .  
 AtPLC1 VGDS. GI WTFN. . . . . AVGWPKGKH. FRAGDVL VFNYP. . . . . RNHN VVKVD. SGS YNN KTP TGA KPYTS. . . . . GKDR I TLS K. QGNFFI CNFP. . . . . NHCES. . . . . DVI AVT  
 AtSC1 VGNT. KGWTM I G. G. . . . . DYEAWASSRV. FQVGD L V FAYNK. . . . . DYHDVTEVT. HNDFEM EESS KPLRRYKT. . . . . GS DSI S LTKPGLQHFI CGVP. . . . . GHCKK. . . . . GOKLQI H  
 AtSC2 VGDS. DGWTI AS. V. . . . . NYETWASTI T. FQVGD L V FAYNK. . . . . DYHDVTEVT. HNDFEM EESS KPLRRYKT. . . . . GS DI VI LTKPGLQHFI CGFP. . . . . GHCDV. . . . . GOKLQI H  
 AtSC3 VGDD. TEWTRPMDP. . . . . EFTYT WATGKT. FRVGDELEFDFAA. . . . . GRHDVAVVS. EAAFE N EKEKPI SHMTVP. . . . . PVKI MLNTTGPQYFI CTVG. . . . . DHC RF. . . . . GOKLSI T  
 AtSC4 VGDS. AGWTI ANV. . . . . DYKL VASTKT. FHI GDTVLFEYNP. . . . . QFN VNVRYT. HPVYRS CNTS KPI STFTT. . . . . GNDSI TLTNHGHFFHF CGVP. . . . . GHCLA. . . . . GOKLDLH  
 AtUC1 VN. . . . . WSLGT. . . . . DYTPLT TGT. FSVGDTI VFNYG. . . . . AGHTVDEVS. ENDYKS I TLGNSI TS DSS. . . . . GTTI I ALTTTGPYFI CGI P. . . . . GHCAA. . . . . GOKLAVT  
 AtUC2 VE. . . . . WSLGK. . . . . DYSSLATGKS. FAVGDTI VFNYG. . . . . AGHTVDEVS. ES DYKS I TLGNAI SS DSS. . . . . GTTS I ALKTPGPHYFI CGI P. . . . . GHCTG. . . . . GOKLSVI  
 AtUC3 I GGP. SGWTVG. . . . . ASLRTWAAGQT. FAVGDN L VFSYPA. . . . . AFHDVVEVT. KPEFDS QAVKPI TFAN. . . . . GNSLVPLTTPGKRYFI CGMP. . . . . GHCS Q. . . . . GOKLEVN  
 AtUC4 I E. . . . . WTTGV. . . . . DYS GWATGKT. FRVGDI LEFKYK. . . . . SSHTVDVVD. KAGYDG DAS S TENHS D. . . . . GDTKI DLKT VGI NYFI CSTP. . . . . GHCR TNGG KLAVN  
 AtUC5 I GGS. QGWEQS. . . . . VDFDS VSS DQS. FKVGDQI VFKYS. . . . . ELIS VVELGS ETAYKS I DLGTS VNS LSS. . . . . GNDVVKLS KTGT RYFA CGTV. . . . . GHCEQ. . . . . GOKI KVN  
 AtUC6 VGDN. DGWTI GV. . . . . EYTS WVS EKT. FRVGDTLEFKYK. . . . . PSIS VAVVN. KADYDG ETS RPTQS FSD. . . . . GDTKI DLT KVGA I HFL CLTP. . . . . GHCS L. . . . . GOKLAVQ  
 AtUC7 VGDI. SGWTS NL. . . . . DYT VWTGKT. FRVGDTLEFVYG. . . . . LSIS VSVVD. KAGYDN DSS GATQNFAD. . . . . GDTKI DLT VGT M HFL CPTF. . . . . GHCKN. . . . . GOKLAVP  
 AtUC8 VGDS. SGWDI SS. . . . . DLES WTS GKR. FSPGDVL M FQYS. . . . . STIS VYEVA. KDNYQN NTTDAI RTFTN. . . . . GNTTVALS KPGNRFV CGNR. . . . . LHCF A. . . . . GOKRLVN  
 AtENODL1 VGGN. GAWVTNP. . . . . QENYNTWAERNR. FQVNDLSYFYKAK. . . . . GS DSVQVN. KADFDG NVRNPI KNFEN. . . . . GESVVT LDRS GAFYFI SGNQ. . . . . DHCKK. . . . . GOKLI VV  
 AtENODL2 VGGS. GAWVTNP. . . . . PENYES VSGKNR. FLVHDTL FSYKAK. . . . . GADS VLEV N. KADYDA NTKNPI KRVD. . . . . GDS EI S LDRYGP FYFI SGNE. . . . . DNCKK. . . . . GOKLNVV  
 AtENODL3 VGKK. DGWVTP. . . . . SEDYS HVS HRNR. FQVNDTLHFYKAK. . . . . GKDS VLEV T. EQEYNT NTTHPLTS LSD. . . . . GDS LFLLS HS GS YFYFI SGNS. . . . . QNCLK. . . . . GOKLAVK  
 AtENODL4 VGGK. DGWVLT. . . . . SEDYS HVS HRNR. FQVNDTLFVYK. . . . . GKDS VLEV S. EKEYNT NTTHPLTS LSD. . . . . GDS LFLLS RS DP FFFVS GS. . . . . GS CLK. . . . . GOKLAVT  
 AtENODL5 VGGENGW I VPKS KTLGDAFNQWAS DNR. FKVGDTLRFKYK. . . . . KDS VLVVS. EEEYKK KATKPLQLYSNN. . . . . EDTVFK LDRP GLFYFI SGVS. . . . . GHCEK. . . . . GOKM I VK  
 AtENODL6 AGGENGW I PQSSNQSDI FNQWAS KNR. FKVGDTLRFKYK. . . . . KDS VLVVT. EDEYKK QTTKPELYS NH. . . . . DDTVFK LDRP GLFYFI SGVS. . . . . GHCEQ. . . . . GOKM I K  
 AtENODL7 VGDEF GMRVPLQND. SAVYS HWASS NR. FHI GDSLS FYVD. . . . . KDS VMEVD. KWGYH GDS DPI TAFDN. . . . . GNS TFDLDRP GLFYFI SGSN. . . . . GHCTS. . . . . GOKLI VE  
 AtENODL8 VG. DLDAWGI PI D. . . . . AKVYS KMPKS HS. FKI GDS LFLFYPP. . . . . SEDS LI QVT. PSNFKS NTKDPI LYND. . . . . GNS LFLNTQNGTLYFIS ANP. . . . . GHCTK. . . . . YOKLLVS  
 AtENODL9 VGGK. TGWVTPS G. . . . . SQVYS QWAEQS R. FQI GDS LFLFYQS. . . . . NQDS VLQVT. RDAYDS NTDS PTKAFAD. . . . . GKTS VTLNHS GPYFYFI SGNK. . . . . DNCKK. . . . . NEKL VVI  
 AtENODL10 VGGKS NTWKAPES R. DETLNQWAS GRTR. FKI GDS LFLVYKNA. . . . . ENDS VLQVR. QTDYER DRS EPI RGYKD. . . . . GHNTI ELKRS GPYFYFI SGEE. . . . . GHCR. . . . . GEKL RVV  
 AtENODL11 VGGS LDWVKPES P. NLSLNHWAS VR. FQVGDALLFKYDS. . . . . KI DS VLQVT. KENYEK NTQKPLEEHKD. . . . . GYTTVK L DVS GPYFYFI SGAPS. . . . . GNAK. . . . . GEKVTVV  
 AtENODL12 VGGS VGS WKVPDS P. NNTLNHWAE NN R. FKVGDFI VWKYDN. . . . . KVDS VLQVT. KEDYES NTANPLKQYND. . . . . GNTKVALDKS GPYFYFI SGAP. . . . . GNAK. . . . . GEKI TLV  
 AtENODL13 VGGKTSS WKI PSSP. SES LNKWAS LR. FRVGDTLVWYDE. . . . . EKDS VLQVT. KDAYI NNTTNPAA NYSN. . . . . GDTKVKLERS GPYFYFI SGSK. . . . . SNQVE. . . . . GEKLH I V  
 AtENODL14 VGGKS GDWKI PPSS. SYS FTEWAQKAR. FKVGDFI VFRYES. . . . . GKDS VLEV T. KEAYNS NTNNPLANYTD. . . . . GETKVKLDRS GPYFYFI SGAN. . . . . GHCEK. . . . . GOKLSLV  
 AtENODL15 VGGKS GDWKI PPSS. SFS FNEWAQKAR. FKVGDFI VFKEYA. . . . . GKDS VLQVT. REAYEK NTTS PKAS YTD. . . . . GNTKVKLDAQGPYFYFI SGTE. . . . . GHCKK. . . . . GOKLRLV  
 AtENODL16 VGDN. KFWNPNI. . . . . NYTI WAQDKH. FYLDWLYFYVYER. . . . . NQY NVI EVN. ETNYI S CNPNPI ANWS RGA. . . . . GRDLVHLNVTRHYLLI SNG. . . . . GCY G. . . . . GOKLAVL  
 AtENODL17 VGDN. KFWNPNI. . . . . NYTI WAQDKH. FYLDWLYFYVYER. . . . . NQY NVI EVN. ETNYI S CNPNPI ANWS RGA. . . . . GRDI VTLNQTKHYLLDGGK. . . . . GCY G. . . . . GOKLSVK  
 AtENODL18 VGESTGWFDI QERP. SANYQWADS KS. FSLGDFLI FNTD. . . . . SNIS VVQTYDFKTYKD. DYDNNE NNDTTEWS AANPS ATS PVPVSI SVPLVKEGS NYFFS GNYDGEQCK. FGQHFMI NV  
 AtENODL19 VGDK. KFWNPNI. . . . . NYTLWAQGKH. FYVGDWLYFYVYR. . . . . DQNI LEVN. KADYEK I SNRPI RNWTRGA. . . . . GRDI VPLYETRRYLLDGRG. . . . . GCY G. . . . . GOKLDVL  
 AtENODL20 GGGR. YTWS DV. . . . . NFS DWANHOR. FYS GDWLYFGFNR. . . . . TRNI LQVN. KSS YEQ VDNVYI FNI TR. G. . . . . GRDV FQLLEPKPYFYFI CGRG. . . . . YCLK. . . . . GOKLAI T  
 AtENODL21 LN. . . . . WVP PANS. SES FNDWAS NKR. FQVGDI I QFKYK. . . . . KDS VMQVT. KES YKQ NSS HPRFYSNT. . . . . GKTRFMDHS VPYFYFI SGTS. . . . . GHCEK. . . . . GOKM I VE  
 AtENODL22 VGGD. DGWDVPVP. . . . . MDTWARGKT. FYAGDI LEFKYDY. . . . . QRFNLI VVN. RTGYET EAVNGAI EYSS. . . . . GDDKI QLN. YGNYFI GTYTP. EDCIT. . . . . GLKVAI K  
 Ghir\_D06G001340.1 VGGS. ENWRYG. . . . . YNYTEWAANTAPFYHDTLVFKYENSTPIS VYLLPNLWS YSTDFS KAKLLANPTQVKG. . . . . DGFEFVLNQWRVYFASGEA. . . . . NDCKEG. . . . . GOKM I V

I

↑

II

III

↑

IV

## Supplemental files 2:Figure S2

Multiple Alignment of the Amino Acid Sequences of the PCNL Domains of the *A. thaliana* Phytocyanin Family and target gene *GhENODL1*(Ghir\_D06G001340.1).The Cys residues involved in the disulfide linkage are indicated in red and the amino acid residues (His, Cys, His and Gln/Met) involved in Cu binding are indicated in I II III IV respectively.



## Supplemental files 3: Table S1

### PCs Identified in *G. hirsutum* Genomes

| Name   | Gene ID         | Length<br>(aa) | MW<br>(kDa) | Isoelectric<br>Point | Charge |
|--------|-----------------|----------------|-------------|----------------------|--------|
| GhPC1  | Ghir_D06G011310 | 107            | 11.763      | 10.232               | 7      |
| GhPC2  | Ghir_A06G007340 | 127            | 13.789      | 5.518                | -2     |
| GhPC3  | Ghir_D11G003980 | 127            | 14.585      | 6.33                 | -0.5   |
| GhPC4  | Ghir_D05G005610 | 128            | 14.513      | 10.255               | 13     |
| GhPC5  | Ghir_A11G004040 | 137            | 15.901      | 7.546                | 3      |
| GhPC6  | Ghir_D06G001340 | 139            | 15.707      | 7.403                | 1      |
| GhPC7  | Ghir_A06G001480 | 139            | 15.717      | 7.243                | 0.5    |
| GhPC8  | Ghir_A05G010410 | 154            | 17.903      | 9.444                | 6.5    |
| GhPC9  | Ghir_A05G006200 | 159            | 17.165      | 9.592                | 6.5    |
| GhPC10 | Ghir_D07G003740 | 161            | 17.383      | 9.387                | 5      |
| GhPC11 | Ghir_A05G013540 | 167            | 18.494      | 6.778                | 1      |
| GhPC12 | Ghir_A13G003590 | 167            | 18.904      | 10.573               | 19     |
| GhPC13 | Ghir_D11G007700 | 167            | 18.685      | 9.529                | 7      |
| GhPC14 | Ghir_D04G004910 | 170            | 19.555      | 6.783                | 0.5    |
| GhPC15 | Ghir_A05G038140 | 171            | 19.764      | 6.941                | 1      |
| GhPC16 | Ghir_A05G012210 | 172            | 18.63       | 8.313                | 3.5    |
| GhPC17 | Ghir_D05G011920 | 173            | 18.682      | 8.313                | 3.5    |
| GhPC18 | Ghir_A11G007760 | 175            | 19.405      | 9.265                | 6      |
| GhPC19 | Ghir_D11G007710 | 175            | 19.359      | 9.299                | 6      |
| GhPC20 | Ghir_D05G006280 | 176            | 18.939      | 10.309               | 11.5   |
| GhPC21 | Ghir_A07G003720 | 178            | 19.011      | 9.605                | 6      |
| GhPC22 | Ghir_D05G013280 | 180            | 19.862      | 6.618                | 0.5    |
| GhPC23 | Ghir_A13G003640 | 184            | 21.078      | 9.286                | 8      |
| GhPC24 | Ghir_A05G005530 | 185            | 20.409      | 10.016               | 10.5   |
| GhPC25 | Ghir_D13G025800 | 188            | 21.473      | 9.039                | 7      |
| GhPC26 | Ghir_A13G013740 | 194            | 21.579      | 6.673                | 0.5    |
| GhPC27 | Ghir_D13G014420 | 194            | 21.634      | 6.344                | -0.5   |
| GhPC28 | Ghir_A02G010500 | 196            | 21.218      | 6.739                | 0.5    |
| GhPC29 | Ghir_D03G009570 | 196            | 21.18       | 8.19                 | 3.5    |
| GhPC30 | Ghir_A13G014720 | 217            | 23.245      | 4.915                | -3.5   |
| GhPC31 | Ghir_D13G015400 | 217            | 23.329      | 4.637                | -5.5   |
| GhPC32 | Ghir_D07G015760 | 229            | 24.983      | 6.657                | 0.5    |
| GhPC33 | Ghir_A07G015510 | 231            | 24.864      | 4.829                | -4.5   |
| GhPC34 | Ghir_D05G007560 | 234            | 25.916      | 4.128                | -14.5  |
| GhPC35 | Ghir_D05G037420 | 242            | 26.017      | 5.545                | -3     |
| GhPC36 | Ghir_A04G002000 | 243            | 26.253      | 5.2                  | -4     |
| GhPC37 | Ghir_A03G017320 | 268            | 29.84       | 6.492                | 0      |



|        |                 |     |        |        |      |
|--------|-----------------|-----|--------|--------|------|
| GhPC38 | Ghir_D02G018560 | 269 | 30.009 | 7.361  | 2.5  |
| GhPC39 | Ghir_A13G015310 | 338 | 35.113 | 9.043  | 12.5 |
| GhPC40 | Ghir_D13G016040 | 338 | 35.2   | 9.043  | 12.5 |
| GhPC41 | Ghir_A04G003340 | 832 | 88.307 | 7.018  | 17.5 |
| GhPC42 | Ghir_D04G015900 | 115 | 12.455 | 7.439  | 1.5  |
| GhPC43 | Ghir_A06G003430 | 127 | 13.698 | 4.426  | -4   |
| GhPC44 | Ghir_D06G003450 | 141 | 15.577 | 4.684  | -3   |
| GhPC45 | Ghir_A09G026390 | 158 | 17.061 | 6.488  | 0    |
| GhPC46 | Ghir_A05G017860 | 161 | 17.24  | 4.607  | -4.5 |
| GhPC47 | Ghir_A04G011560 | 165 | 17.192 | 8.226  | 4.5  |
| GhPC48 | Ghir_A07G024480 | 167 | 18.025 | 7.383  | 1.5  |
| GhPC49 | Ghir_D07G024530 | 167 | 17.953 | 7.383  | 1.5  |
| GhPC50 | Ghir_D05G017860 | 171 | 18.184 | 4.938  | -4   |
| GhPC51 | Ghir_D05G027080 | 171 | 17.992 | 6.214  | -0.5 |
| GhPC52 | Ghir_A05G027060 | 172 | 18.222 | 7.857  | 2.5  |
| GhPC53 | Ghir_A06G003420 | 175 | 18.017 | 4.992  | -2.5 |
| GhPC54 | Ghir_D06G003440 | 175 | 17.999 | 4.992  | -2.5 |
| GhPC55 | Ghir_A08G006290 | 177 | 17.806 | 4.305  | -4   |
| GhPC56 | Ghir_D08G006420 | 177 | 17.782 | 4.305  | -4   |
| GhPC57 | Ghir_A06G016540 | 179 | 19.466 | 4.763  | -4.5 |
| GhPC58 | Ghir_D03G011670 | 184 | 19.68  | 6.233  | -0.5 |
| GhPC59 | Ghir_D06G017430 | 184 | 20.136 | 4.48   | -7   |
| GhPC60 | Ghir_A03G007100 | 187 | 19.968 | 6.228  | -0.5 |
| GhPC61 | Ghir_D05G022710 | 188 | 19.292 | 6.746  | 0.5  |
| GhPC62 | Ghir_A05G022790 | 192 | 19.586 | 6.738  | 0.5  |
| GhPC63 | Ghir_A12G014590 | 204 | 20.971 | 4.303  | -7   |
| GhPC64 | Ghir_D12G014730 | 209 | 21.427 | 4.181  | -8   |
| GhPC65 | Ghir_A13G005810 | 216 | 22.805 | 4.161  | -8   |
| GhPC66 | Ghir_D13G006500 | 258 | 27.022 | 3.894  | -15  |
| GhPC67 | Ghir_A02G007150 | 82  | 8.94   | 9.856  | 7    |
| GhPC68 | Ghir_D05G024440 | 94  | 9.932  | 9      | 4    |
| GhPC69 | Ghir_A09G009400 | 98  | 10.681 | 4.162  | -6.5 |
| GhPC70 | Ghir_A09G009410 | 109 | 11.846 | 6      | -1   |
| GhPC71 | Ghir_D09G009120 | 109 | 11.863 | 5      | -2   |
| GhPC72 | Ghir_D09G009110 | 119 | 13.016 | 5      | -5   |
| GhPC73 | Ghir_D01G018560 | 123 | 13.098 | 10.446 | 14.5 |
| GhPC74 | Ghir_A01G017010 | 123 | 13.257 | 10.679 | 16.5 |
| GhPC75 | Ghir_D04G018430 | 126 | 13.281 | 10     | 12   |
| GhPC76 | Ghir_A04G013970 | 127 | 13.255 | 10.02  | 10.5 |
| GhPC77 | Ghir_A05G024630 | 127 | 13.346 | 9.605  | 8    |
| GhPC78 | Ghir_D02G007560 | 339 | 36.175 | 9.082  | 12   |
| GhPC79 | Ghir_A08G007230 | 157 | 17.562 | 9      | 8    |
| GhPC80 | Ghir_A11G025230 | 161 | 17.416 | 9      | 5    |
| GhPC81 | Ghir_A11G025240 | 162 | 17.378 | 8      | 3    |



|         |                 |     |        |        |       |
|---------|-----------------|-----|--------|--------|-------|
| GhPC82  | Ghir_D11G025370 | 162 | 17.566 | 8.052  | 2.5   |
| GhPC83  | Ghir_D11G025380 | 162 | 17.52  | 8.052  | 2.5   |
| GhPC84  | Ghir_A01G016200 | 164 | 18.134 | 5      | -6    |
| GhPC85  | Ghir_A12G023640 | 166 | 17.721 | 7      | 2     |
| GhPC86  | Ghir_D12G023630 | 166 | 17.721 | 7.383  | 1.5   |
| GhPC87  | Ghir_A05G001590 | 167 | 17.827 | 5      | -4    |
| GhPC88  | Ghir_D06G005780 | 167 | 17.876 | 5.07   | -3    |
| GhPC89  | Ghir_D05G001780 | 169 | 17.973 | 4.392  | -5.5  |
| GhPC90  | Ghir_A08G018330 | 170 | 18.606 | 7      | 2     |
| GhPC91  | Ghir_D06G009280 | 170 | 18.164 | 9.379  | 8     |
| GhPC92  | Ghir_D01G017730 | 172 | 18.94  | 5      | -6    |
| GhPC93  | Ghir_D08G007280 | 176 | 19.406 | 8.097  | 5     |
| GhPC94  | Ghir_D05G001760 | 180 | 19.072 | 7.193  | 2.5   |
| GhPC95  | Ghir_D11G013060 | 187 | 19.621 | 8.63   | 6     |
| GhPC96  | Ghir_A09G022890 | 189 | 19.813 | 9      | 8     |
| GhPC97  | Ghir_D09G022120 | 189 | 19.853 | 9.166  | 8     |
| GhPC98  | Ghir_A05G013010 | 200 | 21.162 | 4      | -6    |
| GhPC99  | Ghir_D05G012760 | 200 | 21.157 | 4.354  | -5.5  |
| GhPC100 | Ghir_D13G022130 | 200 | 20.488 | 4.469  | -4    |
| GhPC101 | Ghir_A08G007220 | 205 | 22.038 | 8      | 4     |
| GhPC102 | Ghir_A13G021270 | 208 | 21.375 | 5      | -3    |
| GhPC103 | Ghir_A11G025250 | 214 | 23.121 | 7      | 1     |
| GhPC104 | Ghir_D11G025390 | 255 | 27.285 | 4.972  | -2    |
| GhPC105 | Ghir_D11G025400 | 259 | 27.691 | 5.004  | -2    |
| GhPC106 | Ghir_D13G022140 | 268 | 28.239 | 10.033 | 12    |
| GhPC107 | Ghir_A13G010380 | 299 | 31.515 | 8      | 3     |
| GhPC108 | Ghir_A13G021280 | 347 | 35.14  | 8      | 7     |
| GhPC109 | Ghir_A13G021260 | 429 | 45.418 | 5      | -14   |
| GhPC110 | Ghir_D13G022120 | 556 | 60.623 | 4.82   | -16.5 |
| GhPC111 | Ghir_A05G043430 | 111 | 12.338 | 6.925  | 1     |
| GhPC112 | Ghir_D05G024780 | 111 | 12.38  | 6.925  | 1     |
| GhPC113 | Ghir_D05G001770 | 169 | 18.56  | 4.873  | -3.5  |

---



## Supplemental files 3: Table S2

### *ENODLs* Identified in *G. hirsutum* Genomes

| Name             | Accession ID    | Length(aa) | singleIP | GPI | N-glyco | AG | Extensin |
|------------------|-----------------|------------|----------|-----|---------|----|----------|
| <i>GhENODL1</i>  | Ghir_D06G011310 | 107        | -        | +   | -       | +  | -        |
| <i>GhENODL2</i>  | Ghir_A06G007340 | 127        | +        | -   | +       | -  | -        |
| <i>GhENODL3</i>  | Ghir_D11G003980 | 127        | +        | -   | +       | -  | -        |
| <i>GhENODL4</i>  | Ghir_D05G005610 | 128        | +        | +   | +       | +  | -        |
| <i>GhENODL5</i>  | Ghir_A11G004040 | 137        | +        | -   | +       | -  | -        |
| <i>GhENODL6</i>  | Ghir_D06G001340 | 139        | +        | -   | +       | -  | -        |
| <i>GhENODL7</i>  | Ghir_A06G001480 | 139        | +        | -   | +       | -  | -        |
| <i>GhENODL8</i>  | Ghir_A05G010410 | 154        | -        | -   | +       | -  | -        |
| <i>GhENODL9</i>  | Ghir_A05G006200 | 159        | -        | +   | +       | +  | -        |
| <i>GhENODL10</i> | Ghir_D07G003740 | 161        | +        | +   | +       | +  | -        |
| <i>GhENODL11</i> | Ghir_A05G013540 | 167        | +        | +   | +       | +  | -        |
| <i>GhENODL12</i> | Ghir_A13G003590 | 167        | +        | -   | +       | -  | -        |
| <i>GhENODL13</i> | Ghir_D11G007700 | 167        | -        | +   | +       | -  | -        |
| <i>GhENODL14</i> | Ghir_D04G004910 | 170        | +        | +   | +       | +  | -        |
| <i>GhENODL15</i> | Ghir_A05G038140 | 171        | +        | +   | +       | +  | -        |
| <i>GhENODL16</i> | Ghir_A05G012210 | 172        | +        | -   | +       | +  | -        |
| <i>GhENODL17</i> | Ghir_D05G011920 | 173        | +        | -   | +       | +  | -        |
| <i>GhENODL18</i> | Ghir_A11G007760 | 175        | +        | +   | +       | +  | -        |
| <i>GhENODL19</i> | Ghir_D11G007710 | 175        | +        | +   | +       | +  | -        |
| <i>GhENODL20</i> | Ghir_D05G006280 | 176        | -        | +   | +       | +  | -        |
| <i>GhENODL21</i> | Ghir_A07G003720 | 178        | +        | +   | +       | +  | -        |
| <i>GhENODL22</i> | Ghir_D05G013280 | 180        | +        | +   | +       | +  | -        |
| <i>GhENODL23</i> | Ghir_A13G003640 | 184        | +        | -   | +       | -  | -        |
| <i>GhENODL24</i> | Ghir_A05G005530 | 185        | +        | +   | +       | +  | -        |
| <i>GhENODL25</i> | Ghir_D13G025800 | 188        | +        | -   | +       | -  | -        |
| <i>GhENODL26</i> | Ghir_A13G013740 | 194        | +        | +   | +       | +  | +        |
| <i>GhENODL27</i> | Ghir_D13G014420 | 194        | +        | +   | +       | +  | -        |
| <i>GhENODL28</i> | Ghir_A02G010500 | 196        | +        | -   | +       | +  | -        |
| <i>GhENODL29</i> | Ghir_D03G009570 | 196        | +        | -   | +       | +  | -        |
| <i>GhENODL30</i> | Ghir_A13G014720 | 217        | +        | +   | +       | +  | +        |
| <i>GhENODL31</i> | Ghir_D13G015400 | 217        | +        | +   | +       | +  | +        |
| <i>GhENODL32</i> | Ghir_D07G015760 | 229        | +        | -   | +       | +  | +        |
| <i>GhENODL33</i> | Ghir_A07G015510 | 231        | +        | -   | +       | +  | +        |
| <i>GhENODL34</i> | Ghir_D05G007560 | 234        | +        | -   | +       | +  | -        |
| <i>GhENODL35</i> | Ghir_D05G037420 | 242        | +        | -   | +       | +  | +        |
| <i>GhENODL36</i> | Ghir_A04G002000 | 243        | +        | -   | +       | +  | +        |
| <i>GhENODL37</i> | Ghir_A03G017320 | 268        | +        | +   | +       | +  | +        |



|                  |                 |     |   |   |   |   |   |
|------------------|-----------------|-----|---|---|---|---|---|
| <i>GhENODL38</i> | Ghir_D02G018560 | 269 | + | + | + | + | + |
| <i>GhENODL39</i> | Ghir_A13G015310 | 338 | + | + | + | + | + |
| <i>GhENODL40</i> | Ghir_D13G016040 | 338 | + | + | + | + | + |
| <i>GhENODL41</i> | Ghir_A04G003340 | 832 | - | - | + | + | + |

### Supplemental files 3:Table S3

**Genes ontology (GO) analysis involved in biological processes from differentially expressed genes by comparing *GhENODL1-4* transgenic line with WT.**

| Cate<br>gory | GOID       | Description                                | Gene<br>Ratio | Bg<br>Ratio | pvalue   |
|--------------|------------|--------------------------------------------|---------------|-------------|----------|
| BP           | GO:0050832 | defense response to fungus                 | 134           | 298         | 4.55E-23 |
| BP           | GO:0006955 | immune response                            | 159           | 390         | 1.05E-21 |
| BP           | GO:0002376 | immune system process                      | 168           | 426         | 4.58E-21 |
| BP           | GO:0045087 | innate immune response                     | 154           | 382         | 1.70E-20 |
| BP           | GO:0009814 | defense response, incompatible interaction | 90            | 194         | 5.41E-17 |
| BP           | GO:0006979 | response to oxidative stress               | 156           | 451         | 9.99E-14 |
| BP           | GO:0009627 | systemic acquired resistance               | 41            | 79          | 2.22E-10 |
| BP           | GO:0009751 | response to salicylic acid                 | 82            | 219         | 1.09E-09 |
| BP           | GO:0000302 | response to reactive oxygen species        | 70            | 179         | 2.10E-09 |
| BP           | GO:0031347 | regulation of defense response             | 92            | 265         | 9.33E-09 |
| BP           | GO:0071555 | cell wall organization                     | 143           | 492         | 4.99E-07 |
| BP           | GO:0044550 | secondary metabolite biosynthetic process  | 75            | 160         | 1.07E-14 |
| BP           | GO:0052542 | defense response by callose deposition     | 16            | 23          | 3.36E-07 |
| BP           | GO:0070588 | calcium ion transmembrane transport        | 30            | 65          | 1.51E-06 |



|    |            |                                    |     |     |          |
|----|------------|------------------------------------|-----|-----|----------|
| BP | GO:0009620 | response to fungus                 | 162 | 368 | 2.21E-26 |
| BP | GO:0019761 | glucosinolate biosynthetic process | 31  | 53  | 7.03E-10 |
| BP | GO:0009625 | response to insect                 | 21  | 30  | 3.84E-09 |
| BP | GO:0009753 | response to jasmonic acid          | 82  | 235 | 4.53E-08 |

### Supplemental files 3: Table S4

**Genes ontology (GO) analysis involved in biological processes from differential genes by comparing inoculated and non-inoculated *V. dahliae* in *GhENODL1-4* transgenic line.**

| Cate<br>gory | GO<br>ID   | Description                                       | Gene<br>Ratio | Bg<br>Ratio | pvalue   |
|--------------|------------|---------------------------------------------------|---------------|-------------|----------|
| BP           | GO:0009620 | response to fungus                                | 134           | 360         | 2.54E-15 |
| BP           | GO:0006091 | generation of precursor metabolites<br>and energy | 163           | 479         | 2.89E-14 |
| BP           | GO:0006979 | response to oxidative stress                      | 153           | 449         | 1.59E-13 |
| BP           | GO:0050832 | defense response to fungus                        | 106           | 290         | 7.64E-12 |
| BP           | GO:0009735 | response to cytokinin                             | 91            | 238         | 1.37E-11 |
| BP           | GO:0002376 | immune system process                             | 141           | 430         | 3.45E-11 |
| BP           | GO:0016052 | carbohydrate catabolic process                    | 95            | 258         | 5.78E-11 |
| BP           | GO:0009814 | defense response, incompatible<br>interaction     | 77            | 195         | 8.34E-11 |
| BP           | GO:0045087 | innate immune response                            | 126           | 386         | 5.28E-10 |
| BP           | GO:0006955 | immune response                                   | 128           | 394         | 5.43E-10 |
| BP           | GO:0008652 | cellular amino acid biosynthetic<br>process       | 78            | 219         | 1.62E-08 |
| BP           | GO:0009751 | response to salicylic acid                        | 78            | 220         | 2.04E-08 |
| BP           | GO:0000302 | response to reactive oxygen<br>species            | 65            | 174         | 3.13E-08 |
| BP           | GO:0009069 | serine family amino acid metabolic                | 33            | 72          | 3.70E-07 |



|    |            |                                                         |     |     |          |
|----|------------|---------------------------------------------------------|-----|-----|----------|
| BP | GO:0009817 | defense response to fungus,<br>incompatible interaction | 25  | 53  | 4.98E-06 |
| BP | GO:0009414 | response to water deprivation                           | 136 | 373 | 1.05E-14 |
| BP | GO:0006520 | cellular amino acid metabolic<br>process                | 154 | 457 | 3.70E-13 |
| BP | GO:0006790 | sulfur compound metabolic<br>process                    | 125 | 388 | 1.55E-09 |
| BP | GO:0009627 | systemic acquired resistance                            | 31  | 79  | 3.99E-05 |
| BP | GO:0016051 | carbohydrate biosynthetic process                       | 123 | 351 | 4.64E-12 |

### Supplemental files 3: Table S5

**Genes ontology (GO) analysis involved in biological processes from differential genes by comparing inoculated and non-inoculated *V. dahliae* in WT.**

| Cate<br>gory | GOID       | Description                                  | Gene<br>Ratio | Bg<br>Ratio | pvalue   |
|--------------|------------|----------------------------------------------|---------------|-------------|----------|
| BP           | GO:0009991 | response to extracellular stimulus           | 38            | 258         | 5.04E-14 |
| BP           | GO:0031667 | response to nutrient levels                  | 34            | 221         | 3.07E-13 |
| BP           | GO:0042594 | response to starvation                       | 30            | 176         | 5.10E-13 |
| BP           | GO:0009267 | cellular response to starvation              | 23            | 143         | 8.85E-10 |
| BP           | GO:0071456 | cellular response to hypoxia                 | 10            | 28          | 1.83E-08 |
| BP           | GO:0042737 | drug catabolic process                       | 26            | 210         | 2.17E-08 |
| BP           | GO:0016036 | cellular response to phosphate<br>starvation | 14            | 69          | 8.91E-08 |
| BP           | GO:0098754 | detoxification                               | 25            | 213         | 1.16E-07 |
| BP           | GO:0009636 | response to toxic substance                  | 32            | 334         | 2.51E-07 |
| BP           | GO:0009409 | response to cold                             | 36            | 408         | 3.46E-07 |
| BP           | GO:0050832 | defense response to fungus                   | 28            | 309         | 4.18E-06 |
| BP           | GO:0009631 | cold acclimation                             | 10            | 51          | 8.65E-06 |
| BP           | GO:0009414 | response to water deprivation                | 31            | 377         | 9.51E-06 |
| BP           | GO:0000272 | polysaccharide catabolic process             | 18            | 158         | 1.03E-05 |
| BP           | GO:0046677 | response to antibiotic                       | 28            | 330         | 1.44E-05 |
| BP           | GO:0009415 | response to water                            | 31            | 385         | 1.44E-05 |



## Supplemental files 3: Table S6

### Primers used in this study

| Primer names       | Sequence(5'to3')                                       | Purpose             |
|--------------------|--------------------------------------------------------|---------------------|
| GhENODL1-V-F       | GAATTCATGGCTTCAATTGGTTTC                               | VIGS vector         |
| GhENODL1-V-R       | CGGTACCTTAAAAACGTGGCC                                  | VIGS vector         |
| GhENODL1-F         | CGATGGCTTCAATTGGTTTCA                                  | cloning of GhENODL1 |
| GhENODL1-R         | TAAAAACGTGGCCAAGGGA                                    | cloning of GhENODL1 |
| GhENODL1-RT-F      | CCTCTTGGTTGCTTTAGGTGCTT                                | qRT-PCR             |
| GhENODL1-RT-R      | CGCCCATTCGGTGTAATTGTAG                                 | qRT-PCR             |
| GhENODL1-G-F       | GGGGACAAGTTTGTACAAAAAAGCAG<br>GCTTCATGGCTTCAATTGGTTTCA | Gateway vector      |
| GhENODL1-G-R       | GGGGACCACTTTGTACAAGAAAGCTGG<br>GTGAAAACGTGGCCAAGGGA    | Gateway vector      |
| AtEF-1 $\alpha$ -F | AACGGTGCCAGTGGGACG                                     | qRT-PCR             |
| AtEF-1 $\alpha$ -R | CCTTGACAGCAACATTCTTGACAT                               | qRT-PCR             |
| AtEDS1-F1          | CTGTGGAAATGGCTGTGAGGAGT                                | qRT-PCR             |
| AtEDS1-R1          | CGGCAAGTGCGTGACTGAAGATA                                | qRT-PCR             |
| AtNDR1-F1          | TCTTATGGCTTAGTCTCCGTGCG                                | qRT-PCR             |
| AtNDR1-R1          | CGAGGTGGACATCGTCGTAGTAG                                | qRT-PCR             |
| AtPDF1.2-Q-F       | CTTGTTCTCTTTGCTGCTTTC                                  | qRT-PCR             |
| AtPDF1.2-Q-R       | CATGTTTGGCTCCTTCAAG                                    | qRT-PCR             |
| AtPR1-Q-F          | GCTACGCAGAACAATAAG                                     | qRT-PCR             |
| AtPR1-Q-R          | CCAGACAAGTCACCGCTACC                                   | qRT-PCR             |
| AtPR2-Q-F          | GTCTCAAGGAAGGTTTCAG                                    | qRT-PCR             |
| AtPR2-Q-R          | CGTTATCAACAGTGGACT                                     | qRT-PCR             |
| AtPR3-Q-F          | CGGCGACCTCCTTCTTCCTC                                   | qRT-PCR             |
| AtPR3-Q-R          | GAATGATGCCGCTTGTCCCTG                                  | qRT-PCR             |
| AtPR5F             | ACTTCACTCTAAGGAACAAT                                   | qRT-PCR             |
| AtPR5R             | GTTACACATCTACCGTTTC                                    | qRT-PCR             |
| AtRPP4F            | ATATACATGTGAACGTTTCTG                                  | qRT-PCR             |
| AtRPP4R            | CTATATCAACATCAGCATCATC                                 | qRT-PCR             |
| GhUBQ14-F          | CAACGCTCCATCTTGTCCCTT                                  | qRT-PCR             |
| GhUBQ14-R          | TGATCGTCTTTCCCGTAAGC                                   | qRT-PCR             |
| GhEDS1-F           | GTGTTTACTGGACATTCATCTGG                                | qRT-PCR             |
| GhEDS1-R           | CTTGCTTCTTTGTCTACCGT                                   | qRT-PCR             |
| GhNDR1-F           | CCCGTAACCAAGGAGGCTGT                                   | qRT-PCR             |
| GhNDR1-R           | CTGCTAAGGGAAGGCAAGGATAG                                | qRT-PCR             |
| GhNPR1-F           | GTCTGGCTGATGTCAATCTGCG                                 | qRT-PCR             |
| GhNPR1-R           | TCCTTCCCTTGCTCTGTCTTGG                                 | qRT-PCR             |
| GhPR1F             | AAGAATGTGGGTTAGTGAGAGGGT                               | qRT-PCR             |
| GhPR1R             | ACCACTTGAGTATAATGCCCCG                                 | qRT-PCR             |
| GhPR2F             | CCACCAGCAGCAGAAGTTATCG                                 | qRT-PCR             |



|         |                            |         |
|---------|----------------------------|---------|
| GhPR2R  | TTCAAGGTTTGCCTCGGAAGA      | qRT-PCR |
| GhPR3F  | ACTCCACAATCACCGAAGCCAT     | qRT-PCR |
| GhPR3R  | GCATTCCAACCCTTACCACATTC    | qRT-PCR |
| GhPR4F  | TTGCGGCAATGGCTTCAATC       | qRT-PCR |
| GhPR4R  | TGCTCTCACATTATTCGGCA       | qRT-PCR |
| GhPR5F  | GCCGTGATTCATACAGTTATCCTCA  | qRT-PCR |
| GhPR5R  | TTGGCTCTTACTTCCGACCATCT    | qRT-PCR |
| GhPR6F  | CTGGGTGTCCTGGGAAGAAC       | qRT-PCR |
| GhPR6R  | TTGTAGGGGGACGAACAACG       | qRT-PCR |
| GhPR9F  | CAACAGCGCCAACATACAGAG      | qRT-PCR |
| GhPR9R  | CAGCACAAGAGACAATGCCAG      | qRT-PCR |
| GhPR16F | CCCAAAGCTTGCCAAAGCA        | qRT-PCR |
| GhPR16R | GAACATTGGCTGGAGTGACC       | qRT-PCR |
| ITS-F   | CATCAGTCTCTCTGTTTATACCAACG | qRT-PCR |
| ITS-R   | CGATGCGAGCTGTAATACTACGCAA  | qRT-PCR |

---
